# Supplementary material for: Age-Associated Differences in Mental Distress Among Sexual and Gender Minority Adults
Source: Atypon-hosted journal article supplement (doi:10.1176/appi.ps.202100059), 2022-06-23
Supplement: appi.ps.202100059.ds001.pdf [file appi.ps.202100059.ds001.pdf]

**Supplemental Table S1. State and year respondent contributions to current study.**

| <b>State</b>   | <b>2014</b>  | <b>2015</b>  | <b>2016</b>  | <b>2017</b>  | <b>2018</b>  | <b>Total %</b> |
|----------------|--------------|--------------|--------------|--------------|--------------|----------------|
| AZ             | 0            | 0            | 0            | 0            | 100          | 100            |
| CA             | 0            | 0            | 55.94        | 44.06        | 0            | 100            |
| CO             | 0            | 100          | 0            | 0            | 0            | 100            |
| CT             | 0            | 25.99        | 25.77        | 23.13        | 25.11        | 100            |
| DE             | 21.61        | 18.36        | 19.05        | 17.79        | 23.18        | 100            |
| FL             | 0            | 0            | 0            | 58.89        | 41.11        | 100            |
| GA             | 0            | 30.41        | 34.18        | 35.41        | 0            | 100            |
| HI             | 18.73        | 18.25        | 21.1         | 21.06        | 20.85        | 100            |
| ID             | 27.6         | 28.15        | 26.54        | 0            | 17.7         | 100            |
| IL             | 0            | 26.39        | 23.08        | 26.1         | 24.44        | 100            |
| IN             | 27.27        | 13.6         | 26.16        | 32.97        | 0            | 100            |
| IA             | 32.33        | 11.38        | 27.64        | 28.65        | 0            | 100            |
| KS             | 29.82        | 46.5         | 0            | 0            | 23.67        | 100            |
| KY             | 50.89        | 0            | 49.11        | 0            | 0            | 100            |
| LA             | 32.88        | 0            | 23.39        | 20.79        | 22.95        | 100            |
| MD             | 31.14        | 27.34        | 0            | 0            | 41.51        | 100            |
| MA             | 0            | 38.97        | 32.83        | 28.19        | 0            | 100            |
| MN             | 20.48        | 19.61        | 20.16        | 19           | 20.76        | 100            |
| MS             | 0            | 0            | 37.84        | 38.05        | 24.1         | 100            |
| MO             | 0            | 35.08        | 35.76        | 0            | 29.16        | 100            |
| MT             | 41.59        | 0            | 0            | 31.77        | 26.64        | 100            |
| NV             | 22.31        | 15.38        | 23.96        | 20.72        | 17.63        | 100            |
| NY             | 6.63         | 11.52        | 35.78        | 11.6         | 34.47        | 100            |
| NC             | 0            | 0            | 0            | 51.5         | 48.5         | 100            |
| OH             | 18.88        | 18.35        | 20.83        | 19.99        | 21.95        | 100            |
| OK             | 0            | 0            | 0            | 52.89        | 47.11        | 100            |
| PA             | 31.41        | 14.91        | 19.35        | 18.07        | 16.26        | 100            |
| RI             | 0            | 0            | 32.95        | 32.59        | 34.46        | 100            |
| SC             | 0            | 0            | 0            | 50.05        | 49.95        | 100            |
| TN             | 0            | 0            | 0            | 0            | 100          | 100            |
| TX             | 0            | 28.98        | 24.8         | 25.21        | 21.02        | 100            |
| VT             | 26.01        | 0            | 24.96        | 23.91        | 25.11        | 100            |
| VA             | 21.76        | 18.92        | 18.9         | 19.86        | 20.56        | 100            |
| WA             | 0            | 0            | 36.51        | 32.31        | 31.18        | 100            |
| WV             | 0            | 52.42        | 0            | 0            | 47.58        | 100            |
| WI             | 25.63        | 20.67        | 17.93        | 18.86        | 16.91        | 100            |
| WY             | 100          | 0            | 0            | 0            | 0            | 100            |
| <b>Total %</b> | <b>16.29</b> | <b>17.63</b> | <b>21.54</b> | <b>21.09</b> | <b>23.44</b> | <b>100</b>     |

**Supplemental Table S2. Description of variables used in the current analysis.**

| <b>Feature</b>                         | <b>Definition</b>                                                                                                                                                                                                                                                                                                                                                                                                               |
|----------------------------------------|---------------------------------------------------------------------------------------------------------------------------------------------------------------------------------------------------------------------------------------------------------------------------------------------------------------------------------------------------------------------------------------------------------------------------------|
| Sexual orientation and gender identity | <ol style="list-style-type: none"> <li>1. HET&amp;CIS [heterosexual, cis-gendered]</li> <li>2. LG&amp;CIS [lesbian or gay, cis-gendered]</li> <li>3. B&amp;CIS [bisexual, cis-gendered]</li> <li>4. GD [male-to-female, female-to-female, or gender non-conforming, regardless of sexual orientation]</li> </ol> <p><u>Note:</u> Response of “Other/Something else” to sexual orientation resulted in participant omission.</p> |
| Age                                    | <ol style="list-style-type: none"> <li>1. 18-24</li> <li>2. 25-34</li> <li>3. 35-44</li> <li>4. 45-54</li> <li>5. 55-64</li> <li>6. ≥65+</li> </ol>                                                                                                                                                                                                                                                                             |
| Sex                                    | <ol style="list-style-type: none"> <li>1. Male</li> <li>2. Female</li> </ol>                                                                                                                                                                                                                                                                                                                                                    |
| Race/ethnicity                         | <ol style="list-style-type: none"> <li>1. White, Non-Hispanic</li> <li>2. Black, Non-Hispanic</li> <li>3. Other or Multiracial, Non-Hispanic</li> <li>4. Hispanic</li> </ol>                                                                                                                                                                                                                                                    |
| Education level                        | <ol style="list-style-type: none"> <li>1. Did not graduate high school</li> <li>2. Graduated high school</li> <li>3. Attended college or technical school</li> <li>4. Graduated college or technical school</li> </ol>                                                                                                                                                                                                          |
| Relationship status                    | <ol style="list-style-type: none"> <li>1. Married or unmarried couple</li> <li>2. Single [widowed, divorced, separated, and never married]</li> </ol>                                                                                                                                                                                                                                                                           |
| Employment status                      | <ol style="list-style-type: none"> <li>1. Employed or self-employed</li> <li>2. Unemployed or unable to work</li> <li>3. Student/homemaker</li> <li>4. Retired</li> </ol>                                                                                                                                                                                                                                                       |
| Annual income                          | <ol style="list-style-type: none"> <li>1. Less than \$15,000</li> <li>2. \$15,000 to less than \$25,000</li> <li>3. \$25,000 to less than \$35,000</li> <li>4. \$35,000 to less than \$50,000</li> <li>5. \$50,000 and above</li> </ol>                                                                                                                                                                                         |
| Healthcare coverage                    | <ol style="list-style-type: none"> <li>1. Insured</li> <li>2. Uninsured</li> </ol> <p><u>Note:</u> Any coverage, including private health insurance, pre-paid plans (e.g., HMOs), government (e.g., Medicare), or Indian Health Service</p>                                                                                                                                                                                     |
| Multiple chronic conditions            | <ol style="list-style-type: none"> <li>1. 0 or 1 condition(s)</li> <li>2. 2+ conditions</li> </ol> <p><u>Note:</u> Chronic medical conditions included prior diagnosis of angina/coronary artery disease, arthritis, asthma, cancer, chronic obstructive pulmonary disease, diabetes, chronic kidney disease as well as history of myocardial infarction or stroke</p>                                                          |
| Mental distress, last 30 days          | <p>Continuous, 0 to 30 days</p> <p><u>Note:</u> Includes stress, depression, and problems with emotion.</p>                                                                                                                                                                                                                                                                                                                     |
| Frequent mental distress, last 30 days | <ol style="list-style-type: none"> <li>1. 0-13 days</li> <li>2. ≥14 days</li> </ol>                                                                                                                                                                                                                                                                                                                                             |

**Supplemental Figure S1. Study sample selection.**

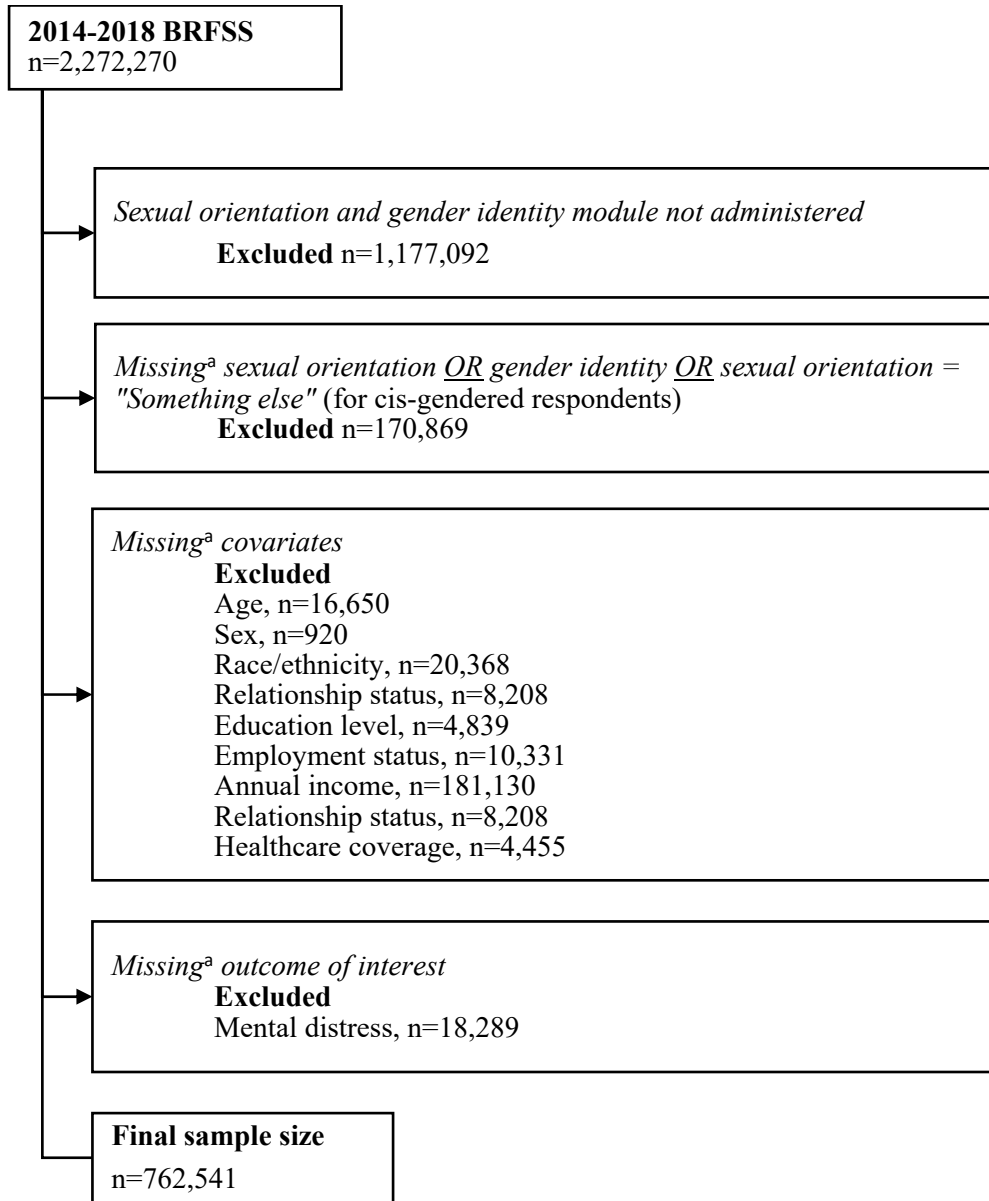

<sup>a</sup> Missing = Don't Know/Not Sure/Refused/Missing/Not Asked

**Supplemental Table S3. Regression models of mean days of mental distress and percentage of frequent mental distress.**

|                                    | <b>Mental distress<sup>1,2</sup></b><br><b>OR [95% Confidence Interval]</b> | <b>Frequent mental distress<sup>1,3</sup></b><br><b>OR [95% Confidence Interval]</b> |
|------------------------------------|-----------------------------------------------------------------------------|--------------------------------------------------------------------------------------|
| <b>SOGI</b>                        |                                                                             |                                                                                      |
| HET                                | REF                                                                         | REF                                                                                  |
| LG                                 | 1.258*** [1.11,1.43]                                                        | 2.132*** [1.56,2.92]                                                                 |
| B                                  | 1.434*** [1.31,1.57]                                                        | 2.673*** [2.20,3.25]                                                                 |
| GD                                 | 1.685*** [1.45,1.97]                                                        | 3.561*** [2.33,5.45]                                                                 |
| <b>Age</b>                         |                                                                             |                                                                                      |
| 18 to 24                           | REF                                                                         | REF                                                                                  |
| 25 to 34                           | 1.098*** [1.05,1.15]                                                        | 1.037 [0.95,1.13]                                                                    |
| 35 to 44                           | 1.051* [1.00,1.10]                                                          | 0.957 [0.88,1.05]                                                                    |
| 45 to 54                           | 0.981 [0.94,1.03]                                                           | 0.827*** [0.76,0.90]                                                                 |
| 55 to 64                           | 0.924*** [0.88,0.97]                                                        | 0.648*** [0.59,0.71]                                                                 |
| 65+                                | 0.748*** [0.71,0.79]                                                        | 0.360*** [0.32,0.40]                                                                 |
| <b>SOGI X Age</b>                  |                                                                             |                                                                                      |
| HET# 18 to 24                      | REF                                                                         | REF                                                                                  |
| HET# 25 to 34                      | REF                                                                         | REF                                                                                  |
| HET# 35 to 44                      | REF                                                                         | REF                                                                                  |
| HET# 45 to 54                      | REF                                                                         | REF                                                                                  |
| HET# 55 to 64                      | REF                                                                         | REF                                                                                  |
| HET# 65+                           | 0.882 [0.74,1.05]                                                           | 0.815 [0.52,1.28]                                                                    |
| LG# 18 to 24                       | 0.879* [0.78,0.99]                                                          | 0.758* [0.59,0.98]                                                                   |
| LG# 25 to 34                       | 0.980 [0.69,1.38]                                                           | 0.738 [0.34,1.61]                                                                    |
| LG# 35 to 44                       | REF                                                                         | REF                                                                                  |
| LG# 45 to 54                       | 0.839 [0.69,1.02]                                                           | 0.696 [0.45,1.08]                                                                    |
| LG# 55 to 64                       | 0.865* [0.76,0.98]                                                          | 0.747 [0.55,1.01]                                                                    |
| LG# 65+                            | 0.598*** [0.45,0.79]                                                        | 0.317** [0.15,0.68]                                                                  |
| B# 18 to 24                        | REF                                                                         | REF                                                                                  |
| B# 25 to 34                        | 0.926 [0.76,1.13]                                                           | 0.652* [0.43,1.00]                                                                   |
| B# 35 to 44                        | 0.843 [0.70,1.02]                                                           | 0.630* [0.44,0.91]                                                                   |
| B# 45 to 54                        | 0.644** [0.49,0.84]                                                         | 0.386** [0.19,0.78]                                                                  |
| B# 55 to 64                        | REF                                                                         | REF                                                                                  |
| B# 65+                             | 0.868 [0.73,1.03]                                                           | 0.571** [0.39,0.85]                                                                  |
| GD # 18 to 24                      | 0.777** [0.65,0.92]                                                         | 0.434*** [0.30,0.62]                                                                 |
| GD # 25 to 34                      | 0.626*** [0.48,0.81]                                                        | 0.383** [0.21,0.70]                                                                  |
| GD # 35 to 44                      | REF                                                                         | REF                                                                                  |
| GD # 45 to 54                      | 0.939 [0.76,1.16]                                                           | 0.664 [0.43,1.03]                                                                    |
| GD # 55 to 64                      | 0.804 [0.64,1.01]                                                           | 0.530** [0.33,0.84]                                                                  |
| GD # 65+                           | 0.667* [0.49,0.91]                                                          | 0.361** [0.19,0.69]                                                                  |
| <b>Sex</b>                         |                                                                             |                                                                                      |
| Male                               | REF                                                                         | REF                                                                                  |
| Female                             | 1.022* [1.00,1.04]                                                          | 1.351*** [1.30,1.40]                                                                 |
| <b>Race/ethnicity</b>              |                                                                             |                                                                                      |
| White, Non-Hispanic                | REF                                                                         | REF                                                                                  |
| Black, Non-Hispanic                | 0.936*** [0.91,0.97]                                                        | 0.716*** [0.67,0.76]                                                                 |
| Other, Non-Hispanic                | 0.950* [0.91,1.00]                                                          | 0.857*** [0.78,0.94]                                                                 |
| Hispanic                           | 0.885*** [0.85,0.92]                                                        | 0.639*** [0.59,0.69]                                                                 |
| <b>Education level</b>             |                                                                             |                                                                                      |
| Did not graduate high school       | REF                                                                         | REF                                                                                  |
| Graduated high school              | 0.947** [0.91,0.98]                                                         | 0.868*** [0.81,0.93]                                                                 |
| Attended college/technical school  | 0.897*** [0.87,0.93]                                                        | 0.923* [0.86,0.99]                                                                   |
| Graduated college/technical school | 0.710*** [0.68,0.74]                                                        | 0.638*** [0.59,0.69]                                                                 |
| <b>Relationship status</b>         |                                                                             |                                                                                      |

|                                    |                      |                      |
|------------------------------------|----------------------|----------------------|
| Married or unmarried couple        | REF                  | REF                  |
| Single                             | 1.043*** [1.02,1.07] | 1.262*** [1.21,1.32] |
| <b>Employment status</b>           |                      |                      |
| Employed/Self-employed             | REF                  | REF                  |
| Unemployed or unable to work       | 1.553*** [1.51,1.60] | 2.926*** [2.78,3.08] |
| Homemaker/Student                  | 0.973 [0.94,1.01]    | 1.052 [0.98,1.13]    |
| Retired                            | 1.289*** [1.24,1.34] | 1.083* [1.00,1.17]   |
| <b>Annual income</b>               |                      |                      |
| Less than \$15K                    | REF                  | REF                  |
| \$15K to <\$25K                    | 0.950*** [0.92,0.98] | 0.834*** [0.78,0.89] |
| \$25K to <\$35K                    | 0.868*** [0.83,0.90] | 0.679*** [0.63,0.73] |
| \$35K to <\$50K                    | 0.854*** [0.82,0.89] | 0.643*** [0.60,0.69] |
| >\$50K                             | 0.756*** [0.73,0.78] | 0.499*** [0.46,0.54] |
| <b>Healthcare coverage</b>         |                      |                      |
| Yes                                | REF                  | REF                  |
| No                                 | 1.034* [1.00,1.07]   | 1.018 [0.96,1.08]    |
| <b>Multiple chronic conditions</b> |                      |                      |
| No                                 | REF                  | REF                  |
| Yes                                | 1.243*** [1.22,1.27] | 1.908*** [1.83,1.99] |
| Observations                       | 762541               | 762541               |

<sup>1</sup> Adjusted for the survey design. Strata with single sampling unit centered at overall mean. Models additionally adjusted for state of residence and year of participation fixed effects (not shown). Exponentiated coefficients; 95% confidence intervals in brackets. \*  $p < 0.05$ , \*\*  $p < 0.01$ , \*\*\*  $p < 0.001$ .

<sup>2</sup> Mental distress = mean number of days in the last month in which participants experienced stress, depression, and problems with emotion (0-30).

<sup>3</sup> Frequent mental distress = percentage of participants experiencing 14 or more days of stress, depression, and problems with emotion in the last month.

Abbreviations: HET: Heterosexual, cis-gendered; LG: Lesbian or gay, cis-gendered; B: Bisexual, cis-gendered; GD: Gender diverse; SOGI: Sexual orientation and gender identity.
